# Supplementary material for: Gene expression profile association with poor prognosis in epithelial ovarian cancer patients
Source: PubMed Central journal article supplement (PMC7940404; doi:10.1038/s41598-021-84953-9), 2021-03-08
Supplement: 41598_2021_84953_MOESM1_ESM.pdf [file 41598_2021_84953_MOESM1_ESM.pdf]

## Gene expression profile association with poor prognosis in epithelial ovarian cancer patients

Douglas V.N.P. Oliveira <sup>1</sup>, Kira P. Prahm <sup>1</sup>, Ib J. Christensen<sup>1</sup>, Anker Hansen<sup>3</sup>, Claus K. Høgdall <sup>2</sup>,  
Estrid V. Høgdall <sup>1,\*</sup>

<sup>1</sup> Department of Pathology, Herlev Hospital, University of Copenhagen, Herlev, Denmark

<sup>2</sup> Department of Gynaecology, Juliane Marie Centre, Rigshospitalet, University of Copenhagen, Copenhagen, Denmark

<sup>3</sup> Oncology Venture, Denmark

\* corresponding author: [estrid.hoegdall@regionh.dk](mailto:estrid.hoegdall@regionh.dk)

Key words: global mRNA profiling, biomarker, ovarian cancer.

Running title: Global mRNA profile in epithelial ovarian cancer.

## Supplementary information

Supplementary Table S1

Supplementary Figure S1

Supplementary Figure S2

Supplementary Figure S3

Supplementary Figure S4

Supplementary Figure S5

Supplementary Figure S6

Supplementary Figure S7

Supplementary Figure S8

| Histologic subtype | HSPA1A |          | CD99   |          | RAB3A  |          | POM121L9P |          |
|--------------------|--------|----------|--------|----------|--------|----------|-----------|----------|
|                    | Median | Std.Dev. | Median | Std.Dev. | Median | Std.Dev. | Median    | Std.Dev. |
| Clear Cell         | 9.456  | 0.812    | 9.348  | 0.611    | 5.789  | 0.292    | 3.364     | 0.437    |
| Endometrioid       | 9.121  | 0.576    | 9.248  | 1.049    | 5.718  | 0.420    | 3.153     | 0.461    |
| Mucinous           | 9.668  | 0.629    | 9.188  | 0.268    | 5.781  | 0.431    | 3.498     | 0.389    |
| Serous             | 9.933  | 0.724    | 8.949  | 0.623    | 5.929  | 0.427    | 3.284     | 0.714    |

**Supplementary Table S1.** Median expression values of *HSPA1A*, *CD99*, *RAB3A* and *POM121L9P* in each histologic subtype. Std.Dev.= standard deviation.

## Supplementary Figure S1

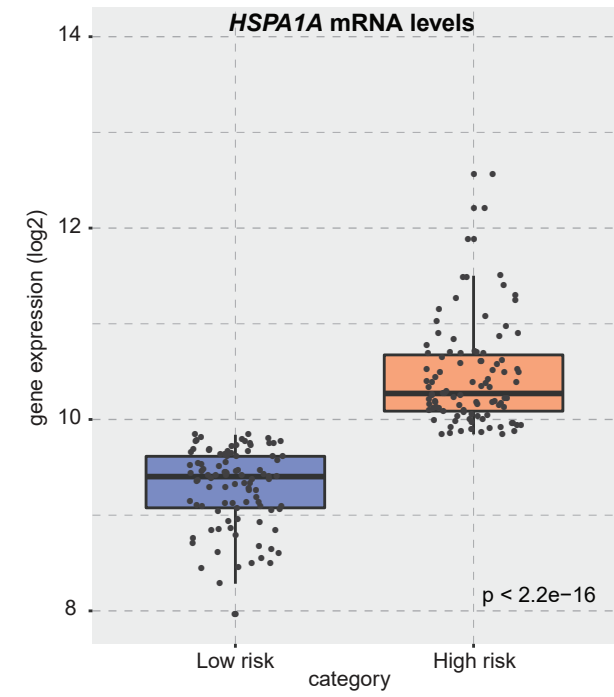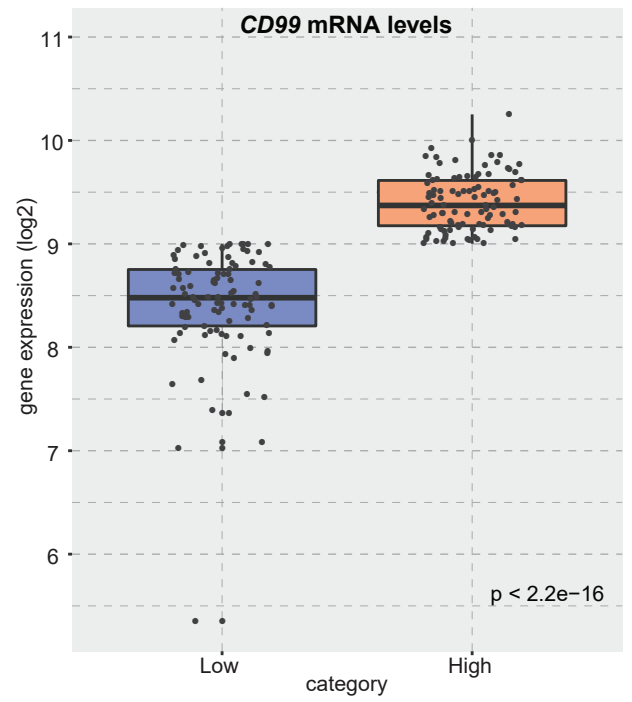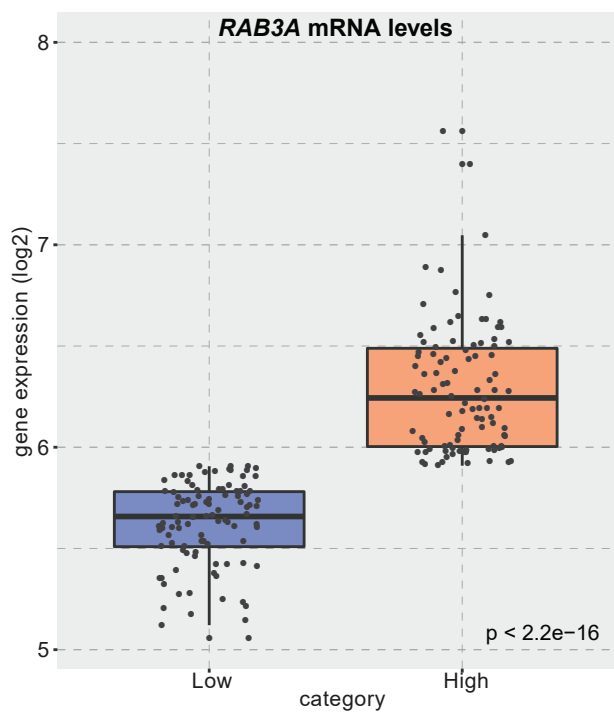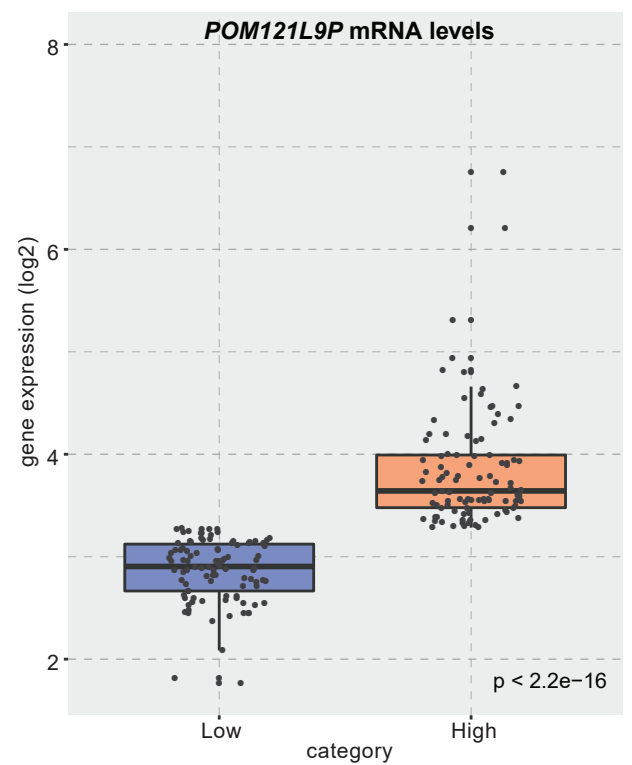

**Supplementary Figure S1.** Gene expression in “low risk” (blue) and “high risk” (orange) groups. Values are normalized and provided as log2 and P-value is presented above.

## Supplementary Figure S2

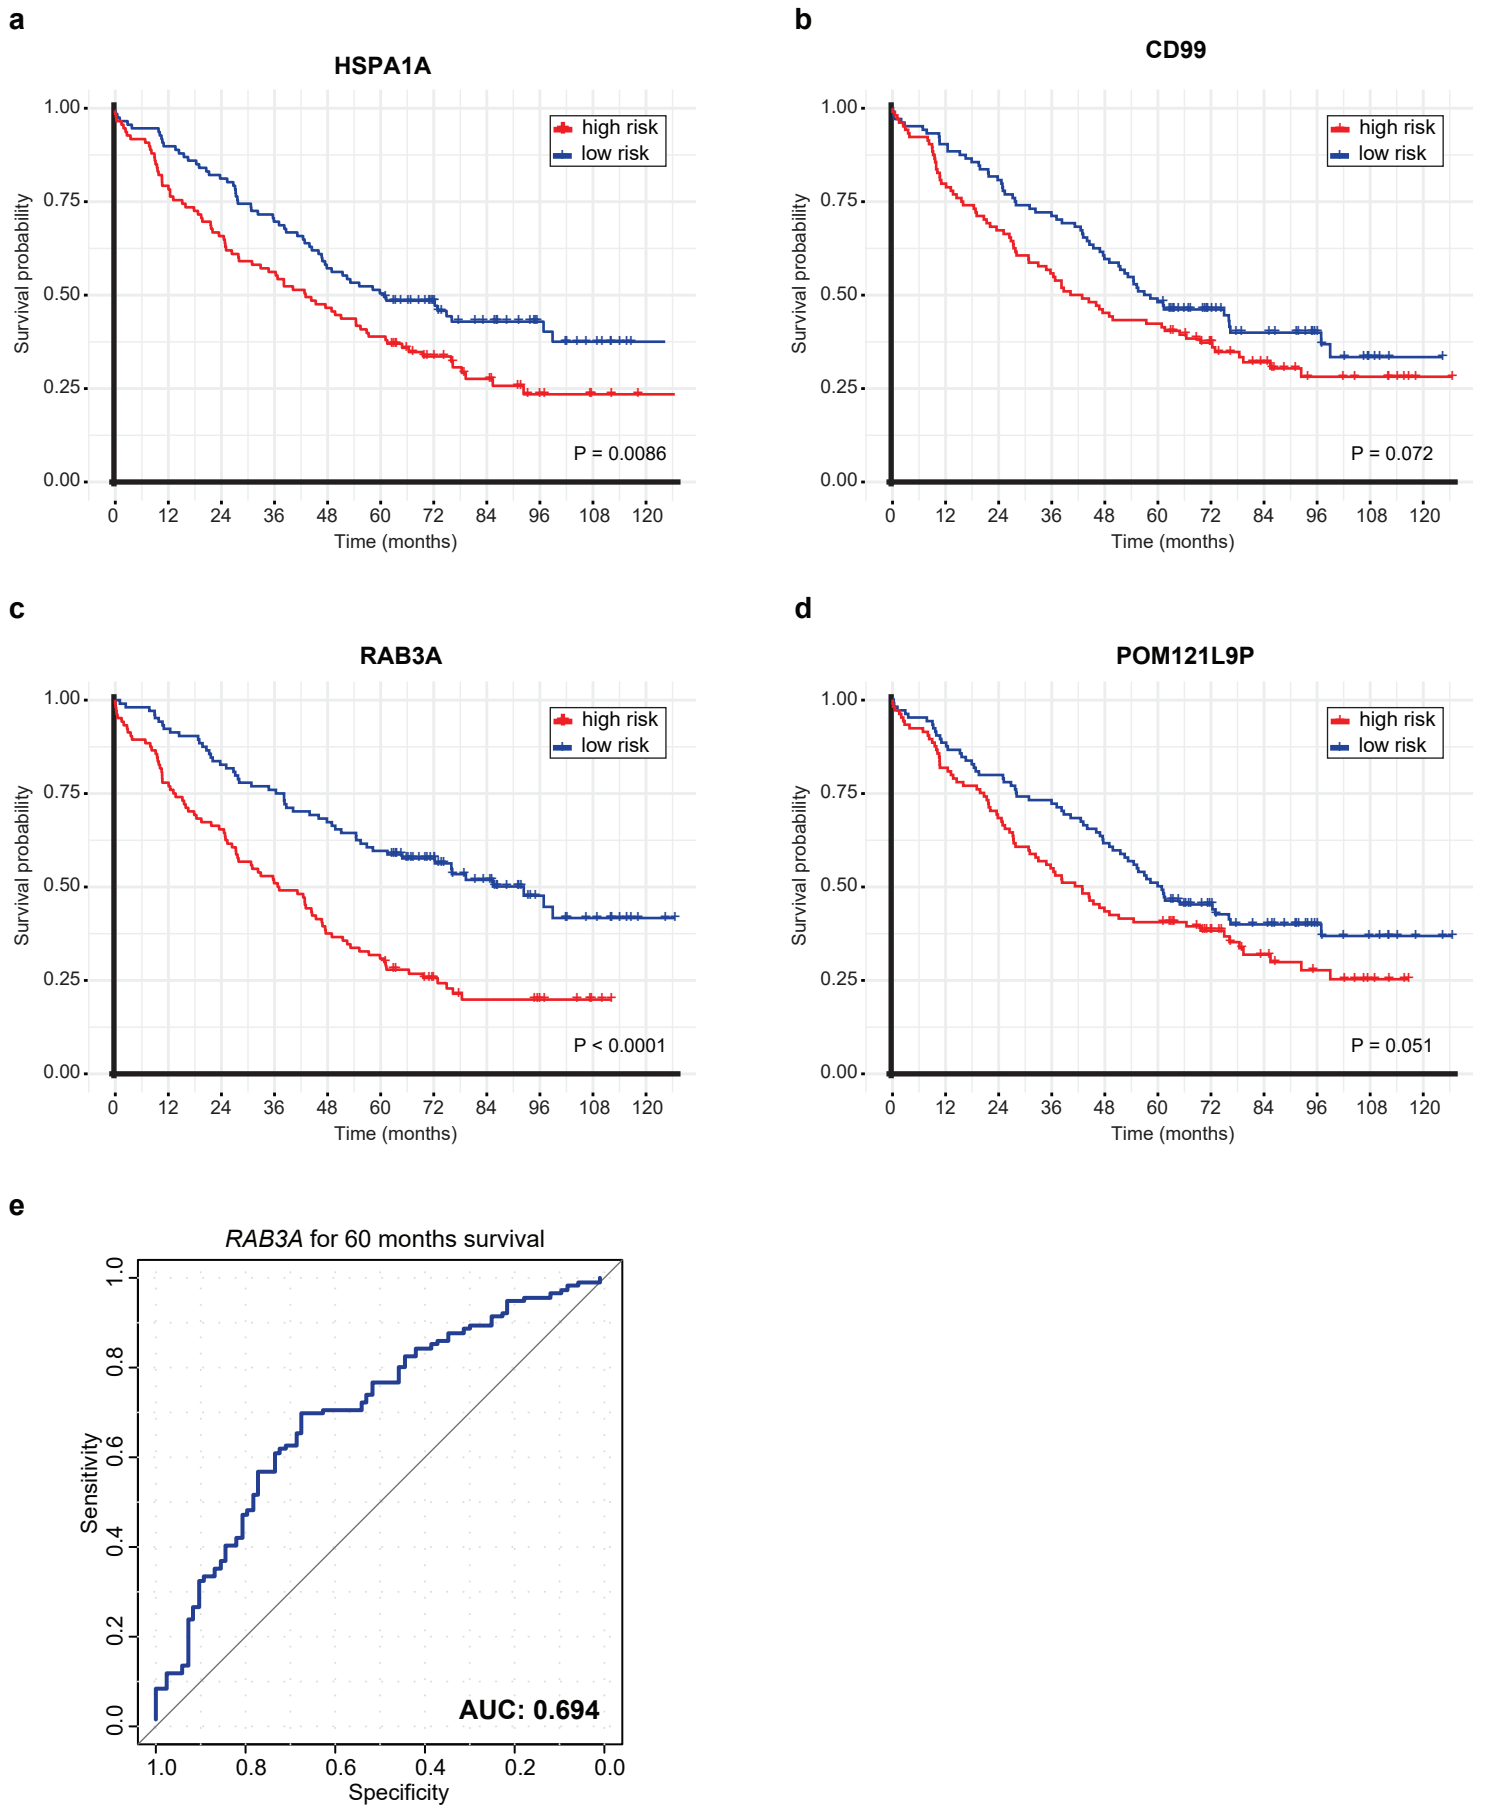

**Supplementary Figure S2.** Overall survival curves for each candidate (*HSPA1A*, *CD99*, *RAB3A* and *POM121L9P*) individually in “high risk” (red) and “low risk” (blue) groups (a-d). (e)ROC/AUC for *RAB3A* alone for 60 months patient OS. P-values are presented above.

### Supplementary Figure S3

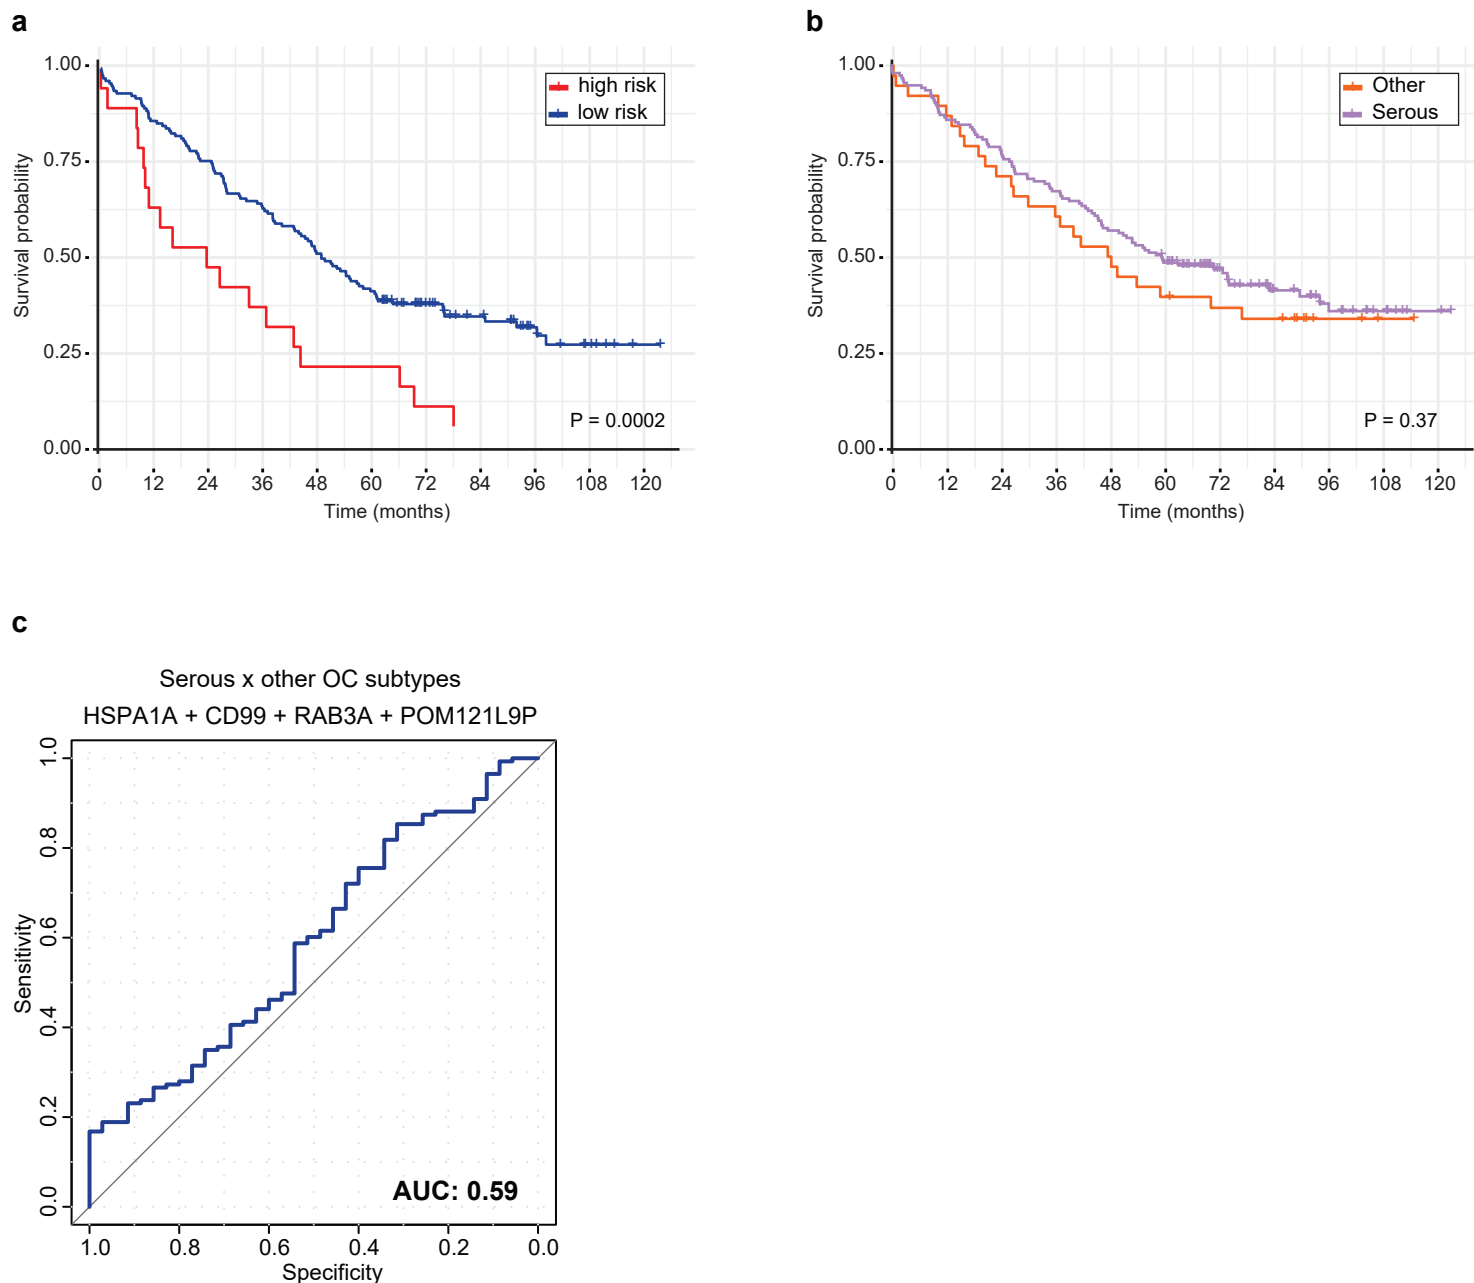

**Supplementary Figure S3.** (a) Survival curve between “high risk” (red) and “low risk” (blue) in serous adenocarcinoma subtype. (b) Survival curve between serous adenocarcinoma and other OC subtypes. (c) AUC/ROC curve of combination of HSPA1A, CD99, RAB3A and POM121L9P in serous adenocarcinoma x other OC subtypes. P-values and AUC are presented above.

## Supplementary Figure S4

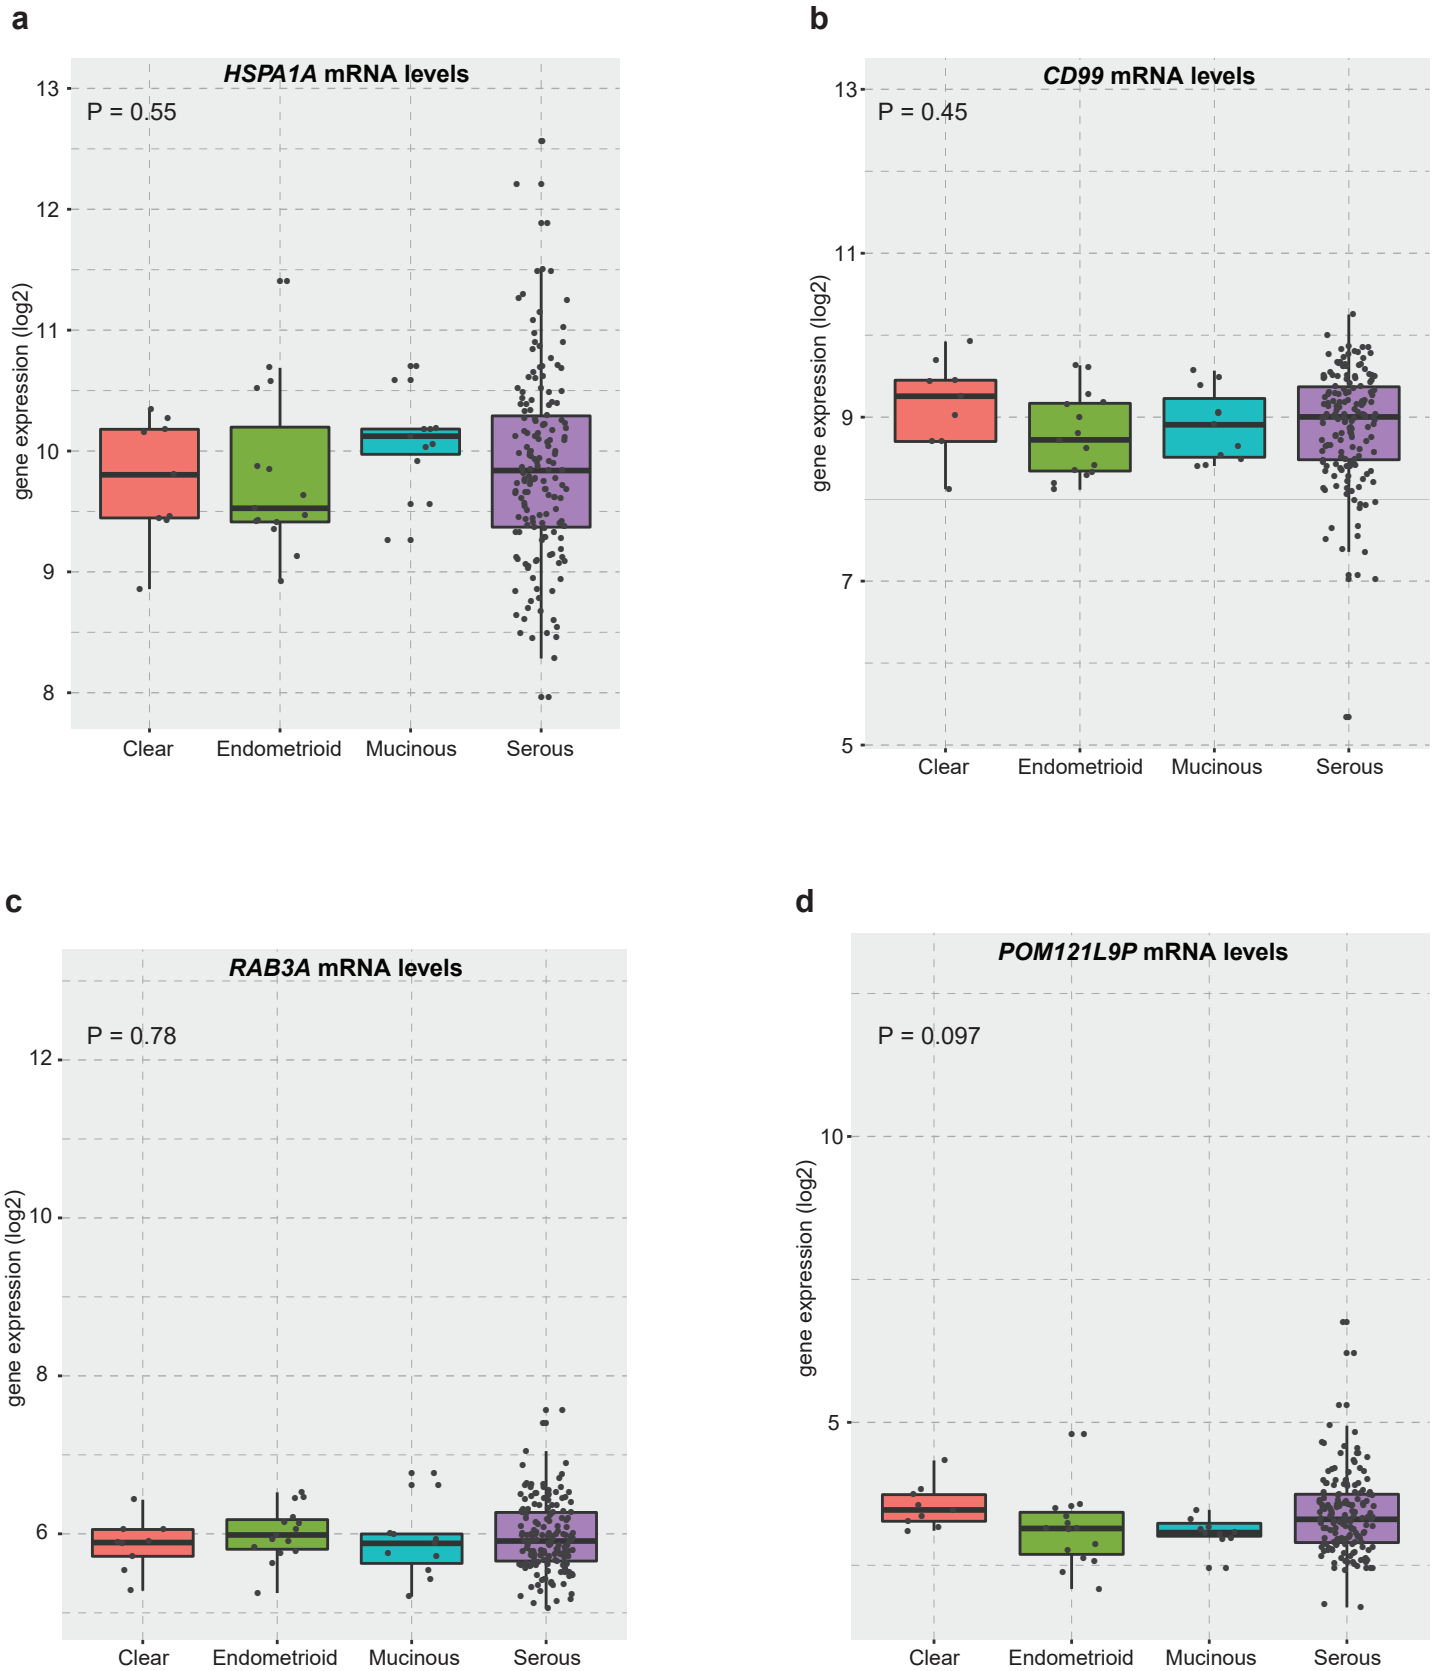

**Supplementary Figure S4.** Gene expression in all OC subtypes for *HSPA1A* (a), *CD99* (b), *RAB3A* (c) and *POM121L9P* (d). Values are normalized and provided as log2 and P-values are presented above.

## Supplementary Figure S5

**a**

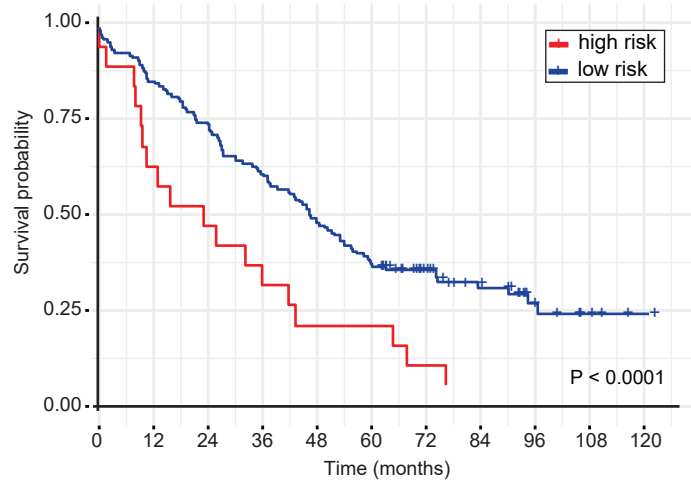

**Supplementary Figure S5.** Survival curve between “high risk” (red) and “low risk” (blue) in high grade serous adenocarcinoma subtype. P-value is presented above.



## Supplementary Figure S6

**a**

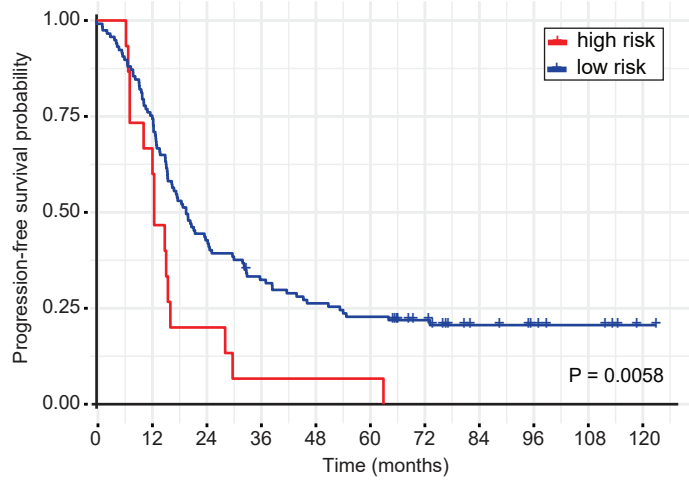

**b**

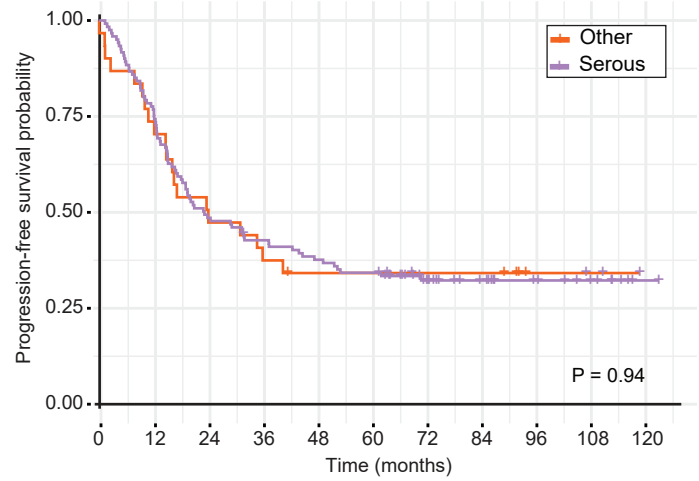

**Supplementary Figure S6.** (a) Progression-free survival curve between “high risk” (red) and “low risk” (blue) in serous adenocarcinoma subtype. (b) Progression-free survival curve between serous adenocarcinoma and other OC subtypes. P-values are presented above.

# Supplementary Figure S7

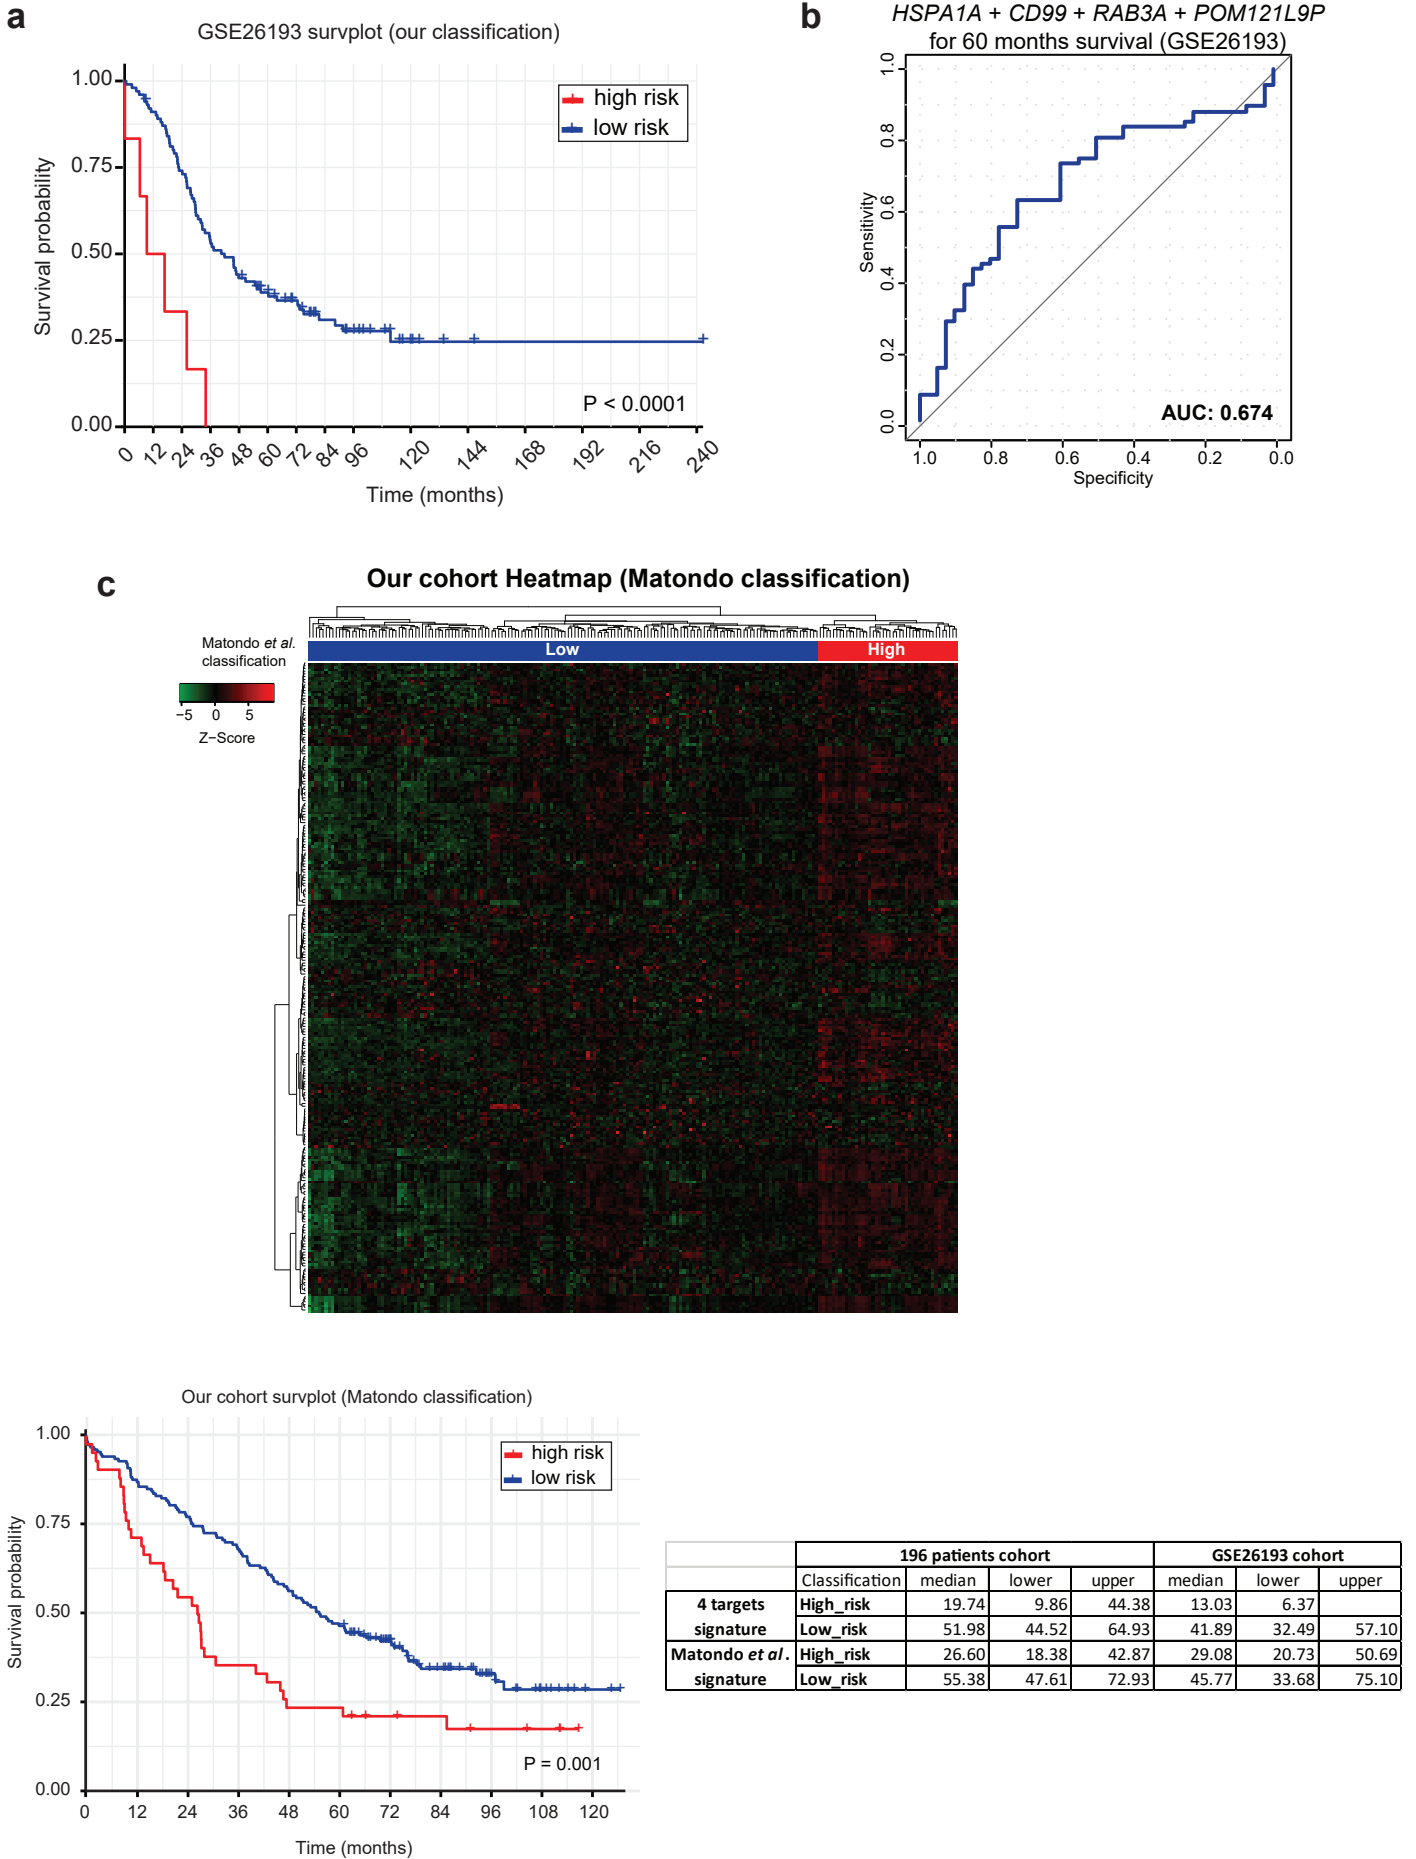

**Supplementary Figure S7.** Validation study. (a) Survival curve shows that “high risk” (all candidates overexpressed) group has a shorter survival compared to “low risk” OC patients, and (b) AUC/ROC curve of combination of HSPA1A, CD99, RAB3A and POM121L9P for 5-year OS in cohort GSE26193 ( $n = 107$ ). The 97-gene signature performance from Matondo *et al.* (2017) in our current cohort ( $n = 196$ ) showing (c) Heatmap and classification of “high-” (red) and “low risk” (high) groups. (d) K-M curve for the “high-” and “low risk” groups, and table with median OS of patients on both cohorts and both signature panels. P-values and AUC are presented above.

## Supplementary Figure S8

a

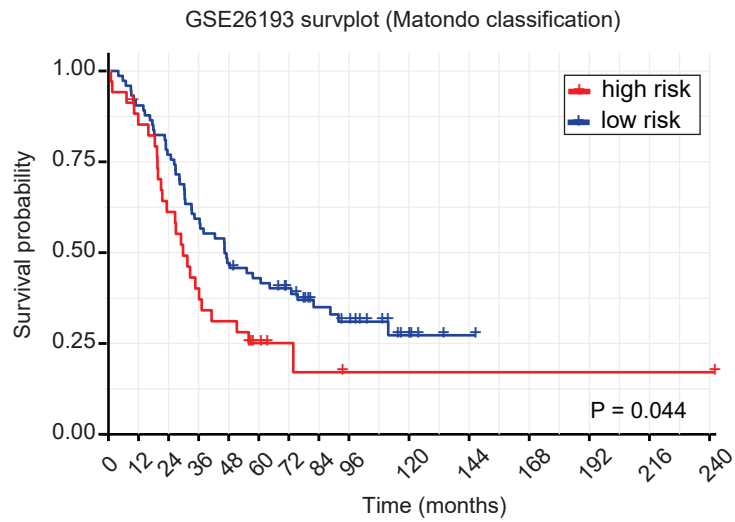

b

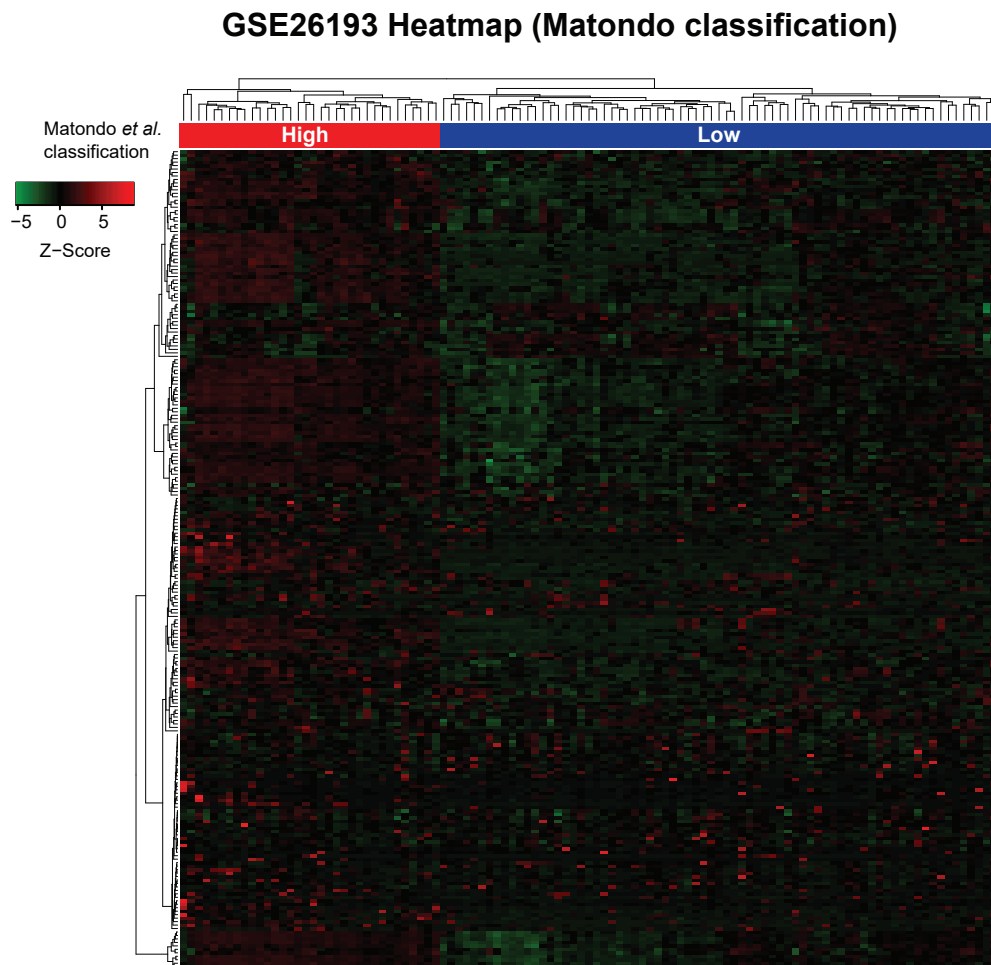

**Supplementary Figure S8.** Assessment of the 97-gene signature panel from Matondo and colleagues on cohort GSE26193 (n= 107). (a) Survival curve shows that “high risk” group has a shorter survival compared to “low risk” OC patients. (b) Heatmap and classification of “high-” (red) and “low risk” (high) groups. P-value is presented above.
